# Supplementary material for: Adaption of FMDV Asia-1 to Suspension Culture: Cell Resistance Is Overcome by Virus Capsid Alterations
Source: MDPI journal article supplement (doi:10.3390/v9080231), 2017-08-18
Supplement: s1 [file s1]

# Supplementary Materials: Adaption of FMDV Asia-1 to Suspension Culture: Cell Resistance is Overcome by Virus Capsid Alterations

**Table S1.** Overview about the virus isolates used in this study and their passage history.

| <b>Virus Isolate</b>                          | <b>Passage History*</b>            |
|-----------------------------------------------|------------------------------------|
| Asia-1 Shamir/ISR/89<br>(original)            | BHK6 (FLI)                         |
| #9 Asia-1                                     | + production BHK 5, BHK-2P 5 (FLI) |
| #8 Asia-1                                     | + BHK21-InVitrus 7, BHK-2P 9 (FLI) |
| #3 Asia-1                                     | + BHK21C13 7, BHK-2P 9 (FLI)       |
| Asia TUR 6/2014                               | BTY 1 (WRL), BHK 25 (FLI)          |
| Asia TUR 6/2014-PT                            | BTY 1 (WRL), PT 18 (FLI)           |
| Asia HKN 5/2005                               | BHK 9 (FLI)                        |
| Asia PAK 5/2012                               | BTY 1 (WRL), BHK 8 (FLI)           |
| A <sub>24</sub> Cruzeiro/BRA/55<br>(original) | CP 6 BHK 2 (WRL), BHK 4 (FLI)      |
| A <sub>24</sub> -2P                           | + BHK-2P 20 (FLI)                  |
| O <sub>1</sub> Manisa/TUR/69                  | BHK 8 (WRL), BHK 8 (FLI)           |

\* Passage host/passage number (location). Cell lines: BHK: Baby hamster kidney; PT: Ovine cell line; CP: Cattle passage. BHK = adherent BHK21; BHK-2P, production BHK, BHK21-InVitrus, BHK21C13 = suspension cell lines. WRL: FMD World Reference Laboratory, Pirbright, UK; FLI: Friedrich-Loeffler-Institut, Greifswald, Germany.

**Table S2.** Passaging of FMDV Asia-1 Shamir on different BHK cell lines.

Cells grown in monolayers:

| Cell line and medium                        | Virus passage* | Infection volume | cytopathic effect (CPE) |
|---------------------------------------------|----------------|------------------|-------------------------|
| #1: adherent BHK21C13 in GMEM with 8.5% FBS | 1              | 50 µL            | 100% after 24h          |
|                                             |                | NC               | no CPE after 24h        |
|                                             | 2              | 30 µL            | 100% after 24h          |
|                                             |                | NC               | no CPE after 24h        |
|                                             | 3              | 10 µL            | 100% after 24h          |
|                                             |                | NC               | no CPE after 24h        |

Cells grown in suspension:

| Cell line and medium                        | Virus passage* | Infection volume | Viability (%) | Total cells/mL (×10 <sup>5</sup> ) | Viable cells/mL (×10 <sup>5</sup> ) |
|---------------------------------------------|----------------|------------------|---------------|------------------------------------|-------------------------------------|
| #2: BHK-2P in GMEM with 10% FBS             | 1              | 5 mL             | 77            | 9.9                                | 7.7                                 |
|                                             |                | NC               | 86            | 12.1                               | 10.4                                |
|                                             | 2              | 5 mL             | 97            | 15.5                               | 15.1                                |
|                                             |                | NC               | 100           | 17.1                               | 17.0                                |
|                                             | 3              | 10 mL            | 93            | 11.6                               | 10.8                                |
|                                             |                | NC               | 93            | 10.9                               | 10.1                                |
|                                             | 4              | 10 mL            | 96            | 15.6                               | 14.9                                |
|                                             |                | NC               | 94            | 17.1                               | 16.1                                |
|                                             | 5              | 10 mL            | 92            | 12.2                               | 11.2                                |
|                                             |                | NC               | 97            | 12.1                               | 11.8                                |
| #3: adherent BHK21C13 in Cellvento™ BHK-200 | 1              | 5 mL             | 77            | 1.8                                | 0.3                                 |
|                                             |                | NC               | 86            | 1.9                                | 1.8                                 |
|                                             | 2              | 5 mL             | 54            | 4.7                                | 2.5                                 |
|                                             |                | NC               | 100           | 4.5                                | 4.5                                 |
|                                             | 3              | 4 mL             | 18            | 5.0                                | 0.9                                 |
|                                             |                | NC               | 89            | 3.4                                | 3.0                                 |
| #4: BHK-2P in BHK-200 (high passage-p8)     | 1              | 5 mL             | 92            | 20.0                               | 18.4                                |
|                                             |                | NC               | 97            | 17.0                               | 16.5                                |
|                                             | 2              | 5 mL             | 97            | 29.9                               | 29.0                                |
|                                             |                | NC               | 96            | 39.9                               | 38.5                                |
|                                             | 3              | 5 mL             | 96            | 17.1                               | 16.4                                |
|                                             |                | NC               | 97            | 14.2                               | 13.8                                |
|                                             | 4              | 5 mL             | 95            | 13.7                               | 13.0                                |
|                                             |                | NC               | 93            | 16.1                               | 15.0                                |
|                                             | 5              | 5 mL             | 96            | 15.7                               | 15.1                                |
|                                             |                | NC               | 99            | 15.0                               | 14.8                                |
|                                             | 6              | 5 mL             | 73            | 13.0                               | 9.6                                 |
|                                             |                |                  |               |                                    |                                     |

|                                                    |                | NC               | 90            | 14.7                               | 13.2                                |
|----------------------------------------------------|----------------|------------------|---------------|------------------------------------|-------------------------------------|
|                                                    |                |                  |               |                                    |                                     |
| Cell line and medium                               | Virus passage* | Infection volume | Viability (%) | Total cells/mL (×10 <sup>5</sup> ) | Viable cells/mL (×10 <sup>5</sup> ) |
| #5: BHK-2P short adaptation to BHK-200 (process 4) | 1              | 5 mL             | 98            | 23.9                               | 23.5                                |
|                                                    |                | NC               | 97            | 22.6                               | 21.9                                |
|                                                    | 2              | 5 mL             | 97            | 46.3                               | 45.1                                |
|                                                    |                | NC               | 99            | 46.2                               | 45.5                                |
|                                                    | 3              | 5 mL             | 97            | 17.1                               | 16.6                                |
|                                                    |                | NC               | 98            | 23.2                               | 22.7                                |
|                                                    | 4              | 5 mL             | 98            | 23.0                               | 22.6                                |
|                                                    |                | NC               | 94            | 20.5                               | 19.4                                |
|                                                    | 5              | 5 mL             | 99            | 19.1                               | 18.9                                |
|                                                    |                | NC               | 99            | 37.2                               | 36.7                                |
| #6: BHK21-C in Cellvento™ BHK-200                  | 1              | 5 mL             | 97            | 22.1                               | 21.4                                |
|                                                    |                | NC               | 99            | 20.4                               | 20.3                                |
|                                                    | 2              | 5 mL             | 99            | 43.2                               | 42.6                                |
|                                                    |                | NC               | 98            | 52.1                               | 51.2                                |
|                                                    | 3              | 5 mL             | 98            | 20.7                               | 20.7                                |
|                                                    |                | NC               | 98            | 19.6                               | 19.3                                |
|                                                    | 4              | 5 mL             | 99            | 24.6                               | 24.3                                |
|                                                    |                | NC               | 99            | 32.6                               | 32.4                                |
|                                                    | 5              | 5 mL             | 98            | 23.7                               | 23.3                                |
|                                                    |                | NC               | 100           | 25.3                               | 25.2                                |
| #7: BHK21- Hektor in Cellvento™ BHK-200            | 6              | 5 mL             | 99            | 51.5                               | 51.0                                |
|                                                    |                | NC               | 98            | 48.2                               | 47.4                                |
|                                                    | 1              | 5 mL             | 97            | 17.8                               | 17.3                                |
|                                                    |                | NC               | 99            | 20.3                               | 20.1                                |
|                                                    | 2              | 5 mL             | 97            | 34.1                               | 32.9                                |
|                                                    |                | NC               | 99            | 26.8                               | 26.4                                |
|                                                    | 3              | 5 mL             | 97            | 13.7                               | 13.3                                |
|                                                    |                | NC               | 98            | 16.0                               | 15.6                                |
|                                                    | 4              | 5 mL             | 94            | 19.0                               | 17.9                                |
|                                                    |                | NC               | 97            | 20.7                               | 20.1                                |
|                                                    | 5              | 5 mL             | 96            | 23.3                               | 22.5                                |
|                                                    |                | NC               | 98            | 20.4                               | 20.0                                |
|                                                    | 6              | 5 mL             | 95            | 33.5                               | 32.0                                |
|                                                    |                | NC               | 93            | 24.7                               | 23.0                                |

| Cell line and medium                             | Virus passage* | Infection volume | Viability (%) | Total cells/mL ( $\times 10^5$ ) | Viable cells/mL ( $\times 10^5$ ) |
|--------------------------------------------------|----------------|------------------|---------------|----------------------------------|-----------------------------------|
| #8: BHK21- InVitrus<br>in Cellvento™ BHK-<br>200 | 1              | 5 mL             | 88            | 17.5                             | 15.3                              |
|                                                  |                | NC               | 98            | 21.6                             | 21.1                              |
|                                                  | 2              | 5 mL             | 84            | 28.9                             | 24.3                              |
|                                                  |                | NC               | 98            | 32.7                             | 32.2                              |
|                                                  | 3              | 5 mL             | 67            | 10.4                             | 6.9                               |
|                                                  |                | NC               | 98            | 15.8                             | 15.6                              |
|                                                  | 4              | 5 mL             | 9             | 11.4                             | 1.0                               |
|                                                  |                | NC               | 96            | 14.8                             | 14.2                              |
|                                                  | 5              | 3 mL             | 5             | 7.4                              | 0.3                               |
|                                                  |                | NC               | 96            | 23.9                             | 22.9                              |
| #9: production BHK in<br>Cellvento™ BHK-200      | 1              | 5 mL             | 84            | 27.2                             | 22.9                              |
|                                                  |                | NC               | 96            | 18.8                             | 18.1                              |
|                                                  | 2              | 5 mL             | 56            | 8.6                              | 4.8                               |
|                                                  |                | NC               | 86            | 7.3                              | 6.3                               |
|                                                  | 3              | 5 mL             | 52            | 17.3                             | 9.0                               |
|                                                  |                | NC               | 92            | 13.2                             | 12.2                              |
|                                                  | 4              | 4 mL             | 40            | 49.6                             | 21.1                              |
|                                                  |                | NC               | 97            | 15.3                             | 14.9                              |

\*Cells have different total numbers of passages due to different growth properties.

**Table S3.** Additional primer mixes used for sequencing.

| <b>Primer</b> | <b>Primer Sequence 5'-3'</b> | <b>Locations* 5'-3'</b> | <b>Amplicon size</b> |
|---------------|------------------------------|-------------------------|----------------------|
| VP3-2835F     | TCG ACG TGT CCC TCG C        | 2835-2851               | 366 bp               |
| VP3-3232R     | AAGTCTTTGCCGGCG              | 3217-3232               |                      |
| VP1-3165F     | ATCAGATCACCCACGG             | 3165-3181               | 451 bp               |
| VP1-3649R     | GTTGCCAGCACACGATG            | 3632-3649               |                      |
| 3D-7320F      | GTTGCAACCCTGATGT             | 7320-7336               | 761 bp               |
| 3D-8113R      | TTCTGCCAATTGCGAC             | 8097-8113               |                      |

\* Location in genome of JF739177.

**Table S4.** Virus passages of Asia-1 Shamir and other serotype Asia-1 isolates on BHK-2P.

First adaption attempt of Asia-1 Shamir

| Passage No.       | cell number<br>(cells/mL)     | infection volume (mL) | cell viability 24 hpi |
|-------------------|-------------------------------|-----------------------|-----------------------|
| 0                 | BHK164 (adherent)             | 50 $\mu$ L in 10 mL   | 100% CPE              |
| 1                 | $8.3 \times 10^5$ (undefined) | 1.35 mL in 30 mL      | 99%                   |
| 2                 | $4.9 \times 10^6$ (undefined) | 1.3                   | 100%                  |
| 3                 | $4.6 \times 10^6$ (undefined) | 10.0                  | 98%                   |
| 4                 | $1.0 \times 10^6$             | 5.0                   | 97%                   |
| 5                 | $1.0 \times 10^6$             | 5.0                   | 98%                   |
| 6                 | $1.0 \times 10^6$             | 10.0                  | 98%                   |
| Infection control | BHK164 (adherent)             | 1 mL of P6            | 0% CPE                |

Second adaption attempt of Asia-1 Shamir

| Passage No.       | cell number (cells/mL) | infection volume (mL) | cell viability 24 hpi |
|-------------------|------------------------|-----------------------|-----------------------|
| 0                 | BHK164 (adherent)      | 50 $\mu$ L in 10 mL   | 100% CPE              |
| 1                 | $1.0 \times 10^6$      | 5.0                   | 98%                   |
| 2                 | $1.0 \times 10^6$      | 15.0                  | 97%                   |
| 3                 | $1.0 \times 10^6$      | 15.0                  | 96%                   |
| 4                 | $1.0 \times 10^6$      | 15.0                  | 96%                   |
| 5                 | $1.0 \times 10^6$      | 15.0                  | 97%                   |
| 6                 | $1.0 \times 10^6$      | 15.0                  | 92%                   |
| 7                 | $1.0 \times 10^6$      | 15.0                  | 99%                   |
| 8                 | $1.0 \times 10^6$      | 15.0                  | 96%                   |
| 9                 | $1.0 \times 10^6$      | 15.0                  | 97%                   |
| Infection control | BHK164 (adherent)      | 1 mL of P9            | 0% CPE                |

Third adaption attempt of Asia-1 Shamir

| Passage No.       | cell number (cells/mL)               | infection volume (mL) | cell viability 24 hpi |
|-------------------|--------------------------------------|-----------------------|-----------------------|
| 0                 | BHK179 (adherent)                    | 50 $\mu$ L in 10 mL   | 100% CPE              |
| 1                 | $1.0 \times 10^6$                    | 10.0                  | 99%                   |
| 2                 | $1.0 \times 10^6$                    | 15.0                  | 99%                   |
| 3                 | $1.0 \times 10^6$                    | 15.0                  | 96%                   |
| 4                 | $1.0 \times 10^6$                    | 15.0                  | 98%                   |
| 5                 | $1.0 \times 10^6$                    | 15.0                  | 96%                   |
| 6                 | $1.0 \times 10^6$                    | 15.0                  | 99%                   |
| Infection control | LFBK $\alpha$ v $\beta$ 6 (adherent) | 50 $\mu$ L of P5      | 0% CPE                |

Adaption attempts of other serotype Asia-1 strains

Asia-1 TUR 6/2014

| Passage No.       | cell number (cells/mL) | infection volume (mL) | cell viability 24 hpi |
|-------------------|------------------------|-----------------------|-----------------------|
| 0                 | BHK179 (adherent)      | 50 µL in 10 mL        | 100% CPE              |
| 1                 | 1.0 ×10 <sup>6</sup>   | 10.0                  | 98%                   |
| 2                 | 1.0 ×10 <sup>6</sup>   | 15.0                  | 100%                  |
| 3                 | 1.0 ×10 <sup>6</sup>   | 15.0                  | 99%                   |
| 4                 | 1.0 ×10 <sup>6</sup>   | 15.0                  | 95%                   |
| 5                 | 1.0 ×10 <sup>6</sup>   | 15.0                  | 99%                   |
| Infection control | LFBKαvβ6 (adherent)    | 50 µL of P4           | 0% CPE                |

Asia-1 TUR 6/2014-PT

| Passage No.       | cell number (cells/mL) | infection volume (mL) | cell viability 24 hpi |
|-------------------|------------------------|-----------------------|-----------------------|
| 0                 | BHK179 (adherent)      | 50 µL in 10 mL        | 100% CPE              |
| 1                 | 1.0 ×10 <sup>6</sup>   | 10.0                  | 99%                   |
| 2                 | 1.0 ×10 <sup>6</sup>   | 15.0                  | 100%                  |
| 3                 | 1.0 ×10 <sup>6</sup>   | 15.0                  | 99%                   |
| 4                 | 1.0 ×10 <sup>6</sup>   | 15.0                  | 100%                  |
| 5                 | 1.0 ×10 <sup>6</sup>   | 15.0                  | 99%                   |
| Infection control | LFBKαvβ6 (adherent)    | 50 µL of P4           | 0% CPE                |

Asia-1 HKN 5/2005

| Passage No.       | cell number (cells/mL) | infection volume (mL) | cell viability 24 hpi |
|-------------------|------------------------|-----------------------|-----------------------|
| 0                 | BHK179 (adherent)      | 50 µL in 10 mL        | 100% CPE              |
| 1                 | 1.0 ×10 <sup>6</sup>   | 10.0                  | 99%                   |
| 2                 | 1.0 ×10 <sup>6</sup>   | 15.0                  | 99%                   |
| 3                 | 1.0 ×10 <sup>6</sup>   | 15.0                  | 97%                   |
| 4                 | 1.0 ×10 <sup>6</sup>   | 15.0                  | 99%                   |
| 5                 | 1.0 ×10 <sup>6</sup>   | 15.0                  | 95%                   |
| 6                 | 1.0 ×10 <sup>6</sup>   | 15.0                  | 99%                   |
| Infection control | LFBKαvβ6 (adherent)    | 50 µL of P5           | 0% CPE                |

Asia-1 PAK 5/2012

| Passage No.       | cell number (cells/mL) | infection volume (mL) | cell viability 24 hpi |
|-------------------|------------------------|-----------------------|-----------------------|
| 0                 | BHK179 (adherent)      | 50 µL in 10 mL        | 100% CPE              |
| 1                 | 1.0 ×10 <sup>6</sup>   | 10.0                  | 99%                   |
| 2                 | 1.0 ×10 <sup>6</sup>   | 15.0                  | 99%                   |
| 3                 | 1.0 ×10 <sup>6</sup>   | 15.0                  | 99%                   |
| 4                 | 1.0 ×10 <sup>6</sup>   | 15.0                  | 99%                   |
| 5                 | 1.0 ×10 <sup>6</sup>   | 15.0                  | 96%                   |
| 6                 | 1.0 ×10 <sup>6</sup>   | 15.0                  | 99%                   |
| Infection control | LFBKαvβ6 (adherent)    | 50 µL of P5           | 0% CPE                |

**Table S5.** Nucleotide and amino acid changes during passaging of Asia-1 in suspension cells.

| Genome<br>Region | Virus Isolate |           |           | AA<br>Change | Change in Charge/Polarity                     |
|------------------|---------------|-----------|-----------|--------------|-----------------------------------------------|
|                  | #3 Asia-1     | #8 Asia-1 | #9 Asia-1 |              |                                               |
| IRES             | T1028Y        | -         | -         |              |                                               |
| Leader           |               | C1195T    |           | no           | no                                            |
| VP3              | -             | -         | G2783A    | yes, E to K  | negative to positive charge                   |
| VP1              | -             | -         | A3512G    | yes, T to A  | polar uncharged to hydrophobic side chain     |
| VP1              | A3588G        |           | -         | yes, Q to R  | polar uncharged side chain to positive charge |
| VP1              | -             | -         | C3593A    | yes, Q to K  | polar uncharged side chain to positive charge |
| VP1              | A3594G        |           | -         | yes, Q to R  | polar uncharged side chain to positive charge |
| VP1              | -             | -         | G3869A    | yes, E to K  | negative to positive charge                   |
| 2C               |               | A4413G    |           | yes, K to R  | no                                            |
| 2C               |               | A5261C    |           | yes, K to Q  | positive charge to polar uncharged side chain |
| 3A               | A5622G        | -         | -         | yes, D to G  | negative charge to uncharged                  |
| 3C               | A6449G        | -         | -         | yes, I to V  | no                                            |
| 3D               | -             | -         | T7339C    | no           | no                                            |

Mutations that are discussed in detail in the paper are shown in *italics*. The remaining mutations are included here for the sake of completeness, but are considered irrelevant for the purposes of this study.
